# Supplementary material
Source: publisher site journal article supplement (http://kjim.org/upload/media/kjim-2021-458-suppl1.pdf)
Supplement: Supplementary file 1 [file kjim-2021-458-suppl1.pdf]

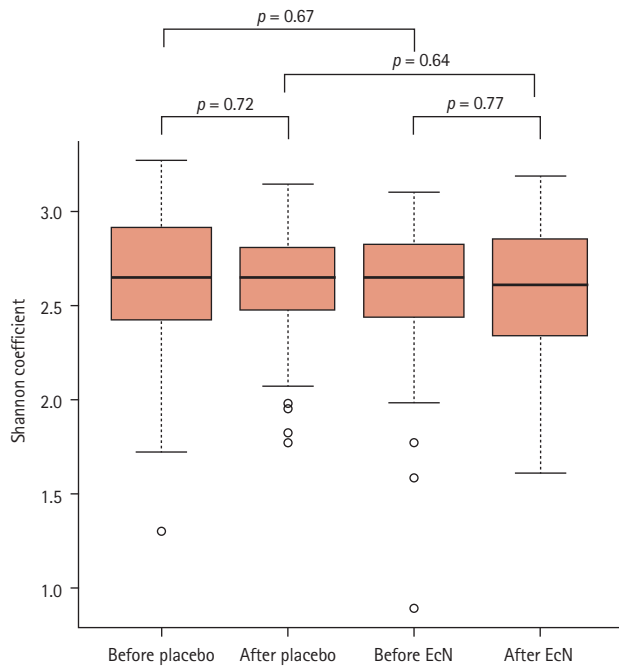

**Supplementary Figure 1.**  $\alpha$ -Diversity boxplots. The  $p$  values between groups were from Wilcoxon rank sum test calculated with R. EcN, *Escherichia coli* Nissle 1917.
